# Supplementary material for: Multimodal in vivo recording using transparent graphene microelectrodes illuminates spatiotemporal seizure dynamics at the microscale
Source: PubMed Central journal article supplement (PMC7846732; doi:10.1038/s42003-021-01670-9), 2021-01-29
Supplement: 42003_2021_1670_MOESM3_ESM.pdf [file 42003_2021_1670_MOESM3_ESM.pdf]

## Description of Additional Supplementary Files

**File name:** Supplementary Video S1 | Multimodal recording during seizure onset.

**Description:** Onset and spread of the seizure activity analyzed in Fig. 3 – Fig. 6. Here, we show the normalized fluorescence video (right), and the relevant data for one selected electrode (blue): fluorescence intensity beneath the electrode, LFP bandpower, spectrogram, and raw signal.
